# Supplementary material for: Right Ventricular Dysfunction in Ventilated Patients with COVID-19 (COVID-RV)
Source: bioRxiv or medRxiv preprint supplement (doi:10.1101/2021.07.29.21261190), 2021-07-31
Supplement: Supplementary file [file media-1.pdf]

**Supplementary table 1. Indicative power**

| <b>Sample Size</b> | <b>Power</b> | <b>Number <i>without</i> RVD</b> | <b>Number <i>with</i> RVD</b> | <b>Mortality in patients <i>without</i> RVD</b> | <b>Mortality in patients <i>with</i> RVD</b> | <b>Odds Ratio</b> |
|--------------------|--------------|----------------------------------|-------------------------------|-------------------------------------------------|----------------------------------------------|-------------------|
| 120                | 80%          | 60                               | 60                            | 0.373                                           | 0.627                                        | 2.83              |
| 120                | 90%          | 60                               | 60                            | 0.354                                           | 0.646                                        | 3.33              |
| 150                | 80%          | 75                               | 75                            | 0.386                                           | 0.614                                        | 2.53              |
| 150                | 90%          | 75                               | 75                            | 0.369                                           | 0.631                                        | 2.92              |
| 120                | 80%          | 90                               | 30                            | 0.427                                           | 0.719                                        | 3.43              |
| 120                | 90%          | 90                               | 30                            | 0.417                                           | 0.749                                        | 4.17              |
| 150                | 80%          | 112                              | 38                            | 0.435                                           | 0.695                                        | 2.96              |
| 150                | 90%          | 112                              | 38                            | 0.426                                           | 0.722                                        | 3.50              |

Differences in mortality rates that could be detected at a 5% significance level for sample sizes of 120 and 150, and proportions of patients with RV dysfunction of 25% and 50%, assuming an overall mortality rate of 50%. RVD = Right Ventricular Dysfunction.

| <b>Supplementary Table 2. Determination of primary outcome</b> |                          |                        |                          |          |
|----------------------------------------------------------------|--------------------------|------------------------|--------------------------|----------|
| <b>RV dilatation</b>                                           | <b>Septal flattening</b> | <b>Primary outcome</b> | <b>Included/excluded</b> | <b>n</b> |
| Yes                                                            | Yes                      | Yes                    | Included                 | 7        |
| Yes                                                            | Unable to assess         | Unknown                | Excluded                 | 0        |
| Yes                                                            | No                       | No                     | Included                 | 24       |
| Unable to assess                                               | No                       | No                     | Included                 | 2        |
| No                                                             | No                       | No                     | Included                 | 74       |
| No                                                             | Yes                      | No                     | Included                 | 2        |
| No                                                             | Unable to assess         | No                     | Included                 | 3        |
| Unable to assess                                               | Unable to assess         | Unknown                | Excluded                 | 6        |

RV = Right Ventricle

**Supplementary Table 3. Patient characteristics at ICU admission**

|                                                     |                          | All<br>(n=112) | RVD<br>(n=33) | No RVD<br>(n=79) | p-value            |
|-----------------------------------------------------|--------------------------|----------------|---------------|------------------|--------------------|
| Age, years                                          |                          | 59.2 (11.3)    | 60.7 (9.9)    | 58.5 (11.8)      | 0.326 <sup>#</sup> |
| Sex, Male                                           |                          | 74 (66.1%)     | 22 (66.7%)    | 52 (65.8%)       | >0.99 <sup>†</sup> |
| BMI, kg m <sup>-2</sup>                             | <i>n (n missing)</i>     | 110 (2)        | 32 (1)        | 78 (1)           |                    |
|                                                     |                          | 32.9 (7.1)     | 32.9 (6.7)    | 32.8 (7.3)       | 0.952 <sup>#</sup> |
| Ethnicity                                           | White                    | 100 (89.3%)    | 26 (78.8%)    | 74 (93.7%)       |                    |
|                                                     | Non-white                | 12 (10.7%)     | 7 (21.2%)     | 5 (6.3%)         | 0.039 <sup>†</sup> |
| Time since symptom onset to intubation, days        |                          | 11 [7, 16]     | 11.0 [7, 17]  | 10.5 [7.2, 14]   | 0.384 <sup>‡</sup> |
| Clinical frailty score                              | <i>n (n missing)</i>     | 111 (1)        | 33 (0)        | 78 (1)           |                    |
|                                                     |                          | 2.4 (0.9)      | 2.4 (1)       | 2.3 (0.9)        | 0.930 <sup>#</sup> |
| APACHE II                                           | <i>n (n missing)</i>     | 107 (5)        | 33 (0)        | 74 (5)           |                    |
|                                                     |                          | 16.6 (5.8)     | 16.8 (5.1)    | 16.6 (6.2)       | 0.877 <sup>#</sup> |
| CCCC                                                | <i>n (n missing)</i>     | 102 (10)       | 29 (4)        | 73 (6)           |                    |
|                                                     |                          | 10.2 (2.7)     | 10.8 (1.9)    | 10.0 (3)         | 0.105 <sup>#</sup> |
| <b>Comorbidities</b>                                |                          |                |               |                  |                    |
| Smoking                                             | Non-smoker               | 63 (56.2%)     | 22 (66.7%)    | 41 (51.9%)       |                    |
|                                                     | Ex-smoker > 1 year       | 40 (35.7%)     | 10 (30.3%)    | 30 (38%)         | 0.293 <sup>†</sup> |
|                                                     | Current or within 1 year | 9 (8%)         | 1 (3%)        | 8 (10.1%)        |                    |
| Alcohol history                                     | <i>n (n missing)</i>     | 110 (2)        | 33 (0)        | 77 (2)           |                    |
|                                                     | None                     | 34 (30.9%)     | 10 (30.3%)    | 24 (31.2%)       |                    |
|                                                     | Minimal                  | 57 (51.8%)     | 20 (60.6%)    | 37 (48.1%)       | 0.544 <sup>†</sup> |
|                                                     | Moderate                 | 8 (7.3%)       | 1 (3%)        | 7 (9.1%)         |                    |
|                                                     | Excess                   | 11 (10%)       | 2 (6.1%)      | 9 (11.7%)        |                    |
| Hypertension                                        |                          | 38 (33.9%)     | 13 (39.4%)    | 25 (31.6%)       | 0.513 <sup>†</sup> |
| Coronary artery disease                             |                          | 11 (9.8%)      | 4 (12.1%)     | 7 (8.9%)         | 0.333 <sup>†</sup> |
| Diabetes                                            |                          | 33 (29.5%)     | 9 (27.3%)     | 24 (30.4%)       | 0.823 <sup>†</sup> |
| Asthma                                              |                          | 16 (14.3%)     | 4 (12.1%)     | 12 (15.2%)       | 0.775 <sup>†</sup> |
| COPD                                                |                          | 10 (8.9%)      | 2 (6.1%)      | 8 (10.1%)        | 0.803 <sup>†</sup> |
| <b>Treatments before intubation</b>                 |                          |                |               |                  |                    |
| Intravenous corticosteroids                         |                          | 74 (66.1%)     | 25 (75.8%)    | 49 (62%)         | 0.193 <sup>†</sup> |
| Non-invasive ventilation                            |                          | 76 (67.9%)     | 22 (66.7%)    | 54 (68.4%)       | >0.99 <sup>†</sup> |
| High flow nasal oxygen                              |                          | 65 (58%)       | 24 (72.7%)    | 41 (51.9%)       | 0.058 <sup>†</sup> |
| Awake self-proning                                  |                          | 57 (50.9%)     | 19 (57.6%)    | 38 (48.1%)       | 0.411 <sup>†</sup> |
| <b>Acute comorbidities since hospital admission</b> |                          |                |               |                  |                    |
| New arrhythmias                                     |                          | 17 (15.2%)     | 6 (18.2%)     | 11 (13.9%)       | 0.573 <sup>†</sup> |
| Confirmed or suspected                              | Radiologically confirmed | 4 (3.6%)       | 4 (12.1%)     | 0 (0%)           |                    |
|                                                     | Clinically suspected     | 5 (4.5%)       | 2 (6.1%)      | 3 (3.8%)         | 0.010 <sup>†</sup> |
| PTE                                                 | No                       | 101 (90.2%)    | 27 (81.8%)    | 74 (93.7%)       |                    |
|                                                     | Unknown                  | 2 (1.8%)       | 0 (0%)        | 2 (2.5%)         |                    |
| ACS                                                 |                          | 5 (4.5%)       | 2 (6.1%)      | 3 (3.8%)         | 0.630 <sup>†</sup> |
| Requirement for RRT                                 |                          | 18 (16.1%)     | 6 (18.2%)     | 12 (15.2%)       | 0.779 <sup>†</sup> |

RVD defined as RV dilatation *and/or* septal flattening

Data are presented as mean (SD), median [IQR] or n (%). Data are complete unless indicated by *n (n missing)*. P-values provided are for comparisons between RVD vs no RVD. # = Student's T-test. † = Fisher's Exact test. ‡ = Wilcoxon Mann-Whitney test.

RVD = Right Ventricular Dysfunction, BMI = Body Mass Index, APACHE = Acute Physiology And Chronic Health Evaluation, CCCC = Coronavirus Clinical Characterisation Consortium, COPD = Chronic Obstructive Pulmonary Disease, PTE = Pulmonary Thromboembolism, ACS = Acute Coronary Syndrome, RRT = Renal Replacement Therapy.

**Supplementary Table 4. Clinical consequences**

|                          | <b>All<br/>(n=112)</b> | <b>RVD<br/>(n=33)</b> | <b>No RVD<br/>(n=79)</b> | <b>p-value</b>     |
|--------------------------|------------------------|-----------------------|--------------------------|--------------------|
| <i>30-day follow-up</i>  |                        |                       |                          |                    |
| <b>Death</b>             | 53 (47.3%)             | 17 (51.5%)            | 36 (45.6%)               | 0.679 <sup>†</sup> |
| <b>RRT</b>               | 28 (25%)               | 9 (27.3%)             | 19 (24.1%)               | 0.879 <sup>†</sup> |
| <b>Prone ventilation</b> | 55 (49.1%)             | 13 (39.4%)            | 42 (53.2%)               | 0.213 <sup>†</sup> |
| <b>Referral for ECMO</b> | 15 (13.4%)             | 1 (3.0%)              | 14 (17.7%)               | 0.097 <sup>†</sup> |

RVD defined as RV dilatation *and/or* septal flattening

Data are presented as n (%). Data are complete unless indicated by *n* (*n missing*). P-values provided are for comparisons between RVD vs no RVD. † = Fisher's Exact test.

RRT = Renal Replacement Therapy, ECMO = Extra Corporeal Membrane Oxygenation.

**Supplementary Table 5. Patient characteristics on day of echocardiography**

|                                                                       |                      | All<br>(n=112)                  | RVD<br>(n=33)                 | No RVD<br>(n=79)               | p-value            |
|-----------------------------------------------------------------------|----------------------|---------------------------------|-------------------------------|--------------------------------|--------------------|
| <b>Requirement for prone invasive ventilation since ICU admission</b> |                      | 79 (70.5%)                      | 28 (84.8%)                    | 51 (64.6%)                     | 0.061 <sup>†</sup> |
| <b>SOFA score</b>                                                     |                      | 7.9 (3)                         | 8.8 (3.2)                     | 7.6 (2.8)                      | 0.048 <sup>#</sup> |
| <b>Requirement for RRT on day of echo</b>                             |                      | 15 (13.4%)                      | 7 (21.2%)                     | 8 (10.1%)                      | 0.135 <sup>†</sup> |
| <b>Lab Measurements</b>                                               |                      |                                 |                               |                                |                    |
| <b>Arterial Blood Gas</b>                                             |                      |                                 |                               |                                |                    |
| <b>[H<sup>+</sup>], nmol L<sup>-1</sup></b>                           | <i>n (n missing)</i> | 97 (15)<br>39 [35.8, 46]        | 29 (4)<br>40.9 [36, 49]       | 68 (11)<br>39 [34.8, 45]       | 0.230 <sup>‡</sup> |
| <b>PaO<sub>2</sub>, kPa</b>                                           |                      | 9.3 (1.2)                       | 9.1 (1.3)                     | 9.4 (1.2)                      | 0.428 <sup>#</sup> |
| <b>PaCO<sub>2</sub>, kPa</b>                                          | <i>n (n missing)</i> | 109 (3)<br>6.9 [5.9, 8]         | 33 (0)<br>7.0 [5.9, 7.9]      | 76 (3)<br>6.8 [5.9, 8]         | 0.929 <sup>‡</sup> |
| <b>BE, mmol</b>                                                       | <i>n (n missing)</i> | 110 (2)<br>5.9 (6.5)            | 33 (0)<br>3.8 (6.4)           | 77 (2)<br>6.8 (6.3)            | 0.026 <sup>#</sup> |
| <b>Bicarbonate, mmol L<sup>-1</sup></b>                               | <i>n (n missing)</i> | 109 (3)<br>31.8 (6.6)           | 33 (0)<br>30.0 (6.1)          | 76 (3)<br>32.5 (6.7)           | 0.063 <sup>#</sup> |
| <b>Full Blood Count</b>                                               |                      |                                 |                               |                                |                    |
| <b>Haemoglobin, g dl<sup>-1</sup></b>                                 |                      | 11 (1.8)                        | 10.7 (1.4)                    | 11.2 (1.9)                     | 0.127 <sup>#</sup> |
| <b>Neutrophils, x10<sup>9</sup> L<sup>-1</sup></b>                    |                      | 10.5 [8.5, 14.9]                | 12.3 [8.9, 17.7]              | 10.3 [8.4, 13.6]               | 0.128 <sup>‡</sup> |
| <b>Lymphocytes, x10<sup>9</sup> L<sup>-1</sup></b>                    |                      | 0.9 [0.5, 1.4]                  | 0.9 [0.7, 1.5]                | 0.9 [0.4, 1.3]                 | 0.239 <sup>‡</sup> |
| <b>Platelets, x10<sup>9</sup> L<sup>-1</sup></b>                      |                      | 279.5 (109.5)                   | 276.5 (105.7)                 | 280.8 (111.7)                  | 0.849 <sup>#</sup> |
| <b>Inflammation</b>                                                   |                      |                                 |                               |                                |                    |
| <b>CRP, mg L<sup>-1</sup></b>                                         |                      | 61.5 [11.8, 157.5]              | 72.0 [14, 178]                | 54.0 [11, 149]                 | 0.375 <sup>‡</sup> |
| <b>Coagulation</b>                                                    |                      |                                 |                               |                                |                    |
| <b>D-Dimers, mg L<sup>-1</sup> FEU</b>                                | <i>n (n missing)</i> | 81 (31)<br>1264 [601, 2605]     | 27 (6)<br>1156 [504, 2822]    | 54 (25)<br>1373 [724.8, 2496]  | 0.745 <sup>‡</sup> |
| <b>PT, seconds</b>                                                    |                      | 12 [11, 13.2]                   | 13 [11, 13]                   | 12 [11, 13.2]                  | 0.264 <sup>‡</sup> |
| <b>APTT, seconds</b>                                                  | <i>n (n missing)</i> | 111 (1)<br>27 [25, 31]          | 33 (0)<br>29 [26, 31]         | 78 (1)<br>26 [24, 30]          | 0.031 <sup>‡</sup> |
| <b>Electrolytes</b>                                                   |                      |                                 |                               |                                |                    |
| <b>Creatinine, μmol L<sup>-1</sup></b>                                |                      | 69.5 [53.5, 107]                | 84 [54, 118]                  | 64 [53, 99]                    | 0.099 <sup>‡</sup> |
| <b>Cardiac biomarkers</b>                                             |                      |                                 |                               |                                |                    |
| <b>NT-proBNP, ng L<sup>-1</sup></b>                                   | <i>n (n missing)</i> | 100 (12)<br>458 [198.5, 1689.5] | 32 (1)<br>537.5 [208, 3634.2] | 68 (11)<br>430.5 [194, 1275.2] | 0.213 <sup>‡</sup> |
| <b>Abnormal NT-proBNP<sup>A</sup></b>                                 | <i>n (n missing)</i> | 100 (12)<br>63 (63%)            | 32 (1)<br>20 (62.5%)          | 68 (11)<br>43 (63.2%)          | >0.99 <sup>†</sup> |
| <b>hsTn I, ng L<sup>-1</sup></b>                                      | <i>n (n missing)</i> | 64 (48)<br>12[4.8, 42]          | 24 (9)<br>19.5 [4.8, 42]      | 40 (39)<br>10.0 [4.8, 40]      | 0.605 <sup>‡</sup> |
| <b>hsTn T, ng L<sup>-1</sup></b>                                      | <i>n (n missing)</i> | 46 (66)<br>16.5 [10, 28.5]      | 9 (24)<br>18 [15, 37]         | 37 (42)<br>16 [10, 26]         | 0.239 <sup>‡</sup> |
| <b>Abnormal troponin<sup>B</sup></b>                                  | <i>n (n missing)</i> | 110 (2)<br>51 (46.4%)           | 33 (0)<br>17 (51.5%)          | 77 (2)<br>34 (44.2%)           | 0.535 <sup>†</sup> |
| <b>Clinical Parameters</b>                                            |                      |                                 |                               |                                |                    |
| <b>HR, bpm</b>                                                        |                      | 79 (19.9)                       | 81.3 (21.1)                   | 78.1 (19.5)                    | 0.446 <sup>#</sup> |
| <b>Rhythm</b>                                                         | <b>Sinus</b>         | 107 (95.5%)                     | 31 (93.9%)                    | 76 (96.2%)                     |                    |
|                                                                       | <b>AF/Flutter</b>    | 5 (4.5%)                        | 2 (6.1%)                      | 3 (3.8%)                       | 0.630 <sup>†</sup> |
| <b>Mean BP, mmHg</b>                                                  | <i>n (n missing)</i> | 109 (3)<br>80.9 (13.4)          | 32 (1)<br>77.9 (10.5)         | 77 (2)<br>82.1 (14.3)          | 0.089 <sup>#</sup> |
| <b>CVP, cmH<sub>2</sub>O</b>                                          | <i>n (n missing)</i> | 74 (38)<br>7 [4, 12]            | 22 (11)<br>7.5 [6.0, 13.8]    | 52 (27)<br>7.0 [3.8, 11.2]     | 0.307 <sup>‡</sup> |
| <b>Drug Administration</b>                                            |                      |                                 |                               |                                |                    |
| <b>Vasopressors</b>                                                   |                      | 40 (35.7%)                      | 18 (54.5%)                    | 22 (27.8%)                     | 0.010 <sup>†</sup> |
| <b>Inotropes</b>                                                      |                      | 1 (0.9%)                        | 1 (3%)                        | 0 (0%)                         | 0.295 <sup>†</sup> |
| <b>Anticoagulation</b>                                                | <b>Prophylactic</b>  | 93 (83%)                        | 24 (72.7%)                    | 69 (87.3%)                     |                    |
|                                                                       | <b>Therapeutic</b>   | 17 (15.2%)                      | 9 (27.3%)                     | 8 (10.1%)                      | 0.057 <sup>†</sup> |
|                                                                       | <b>None</b>          | 2 (1.8%)                        | 0 (0%)                        | 0 (0%)                         |                    |
| <b>Paralysis</b>                                                      |                      | 52 (46.4%)                      | 18 (54.5%)                    | 34 (43%)                       | 0.511 <sup>†</sup> |
| <b>Ventilation</b>                                                    |                      |                                 |                               |                                |                    |
| <b>FiO<sub>2</sub></b>                                                |                      | 0.6 [0.4, 0.7]                  | 0.6 [0.5, 0.7]                | 0.6 [0.4, 0.7]                 | 0.083 <sup>‡</sup> |
| <b>Requirement for prone ventilation in previous 24 hours</b>         |                      | 44 (39.3%)                      | 16 (48.5%)                    | 28 (35.4%)                     | 0.498 <sup>†</sup> |

|                                                             |                      |                          |                            |                              |                    |
|-------------------------------------------------------------|----------------------|--------------------------|----------------------------|------------------------------|--------------------|
| <b>Plateau pressure, cmH<sub>2</sub>O</b>                   |                      | 58 (54)<br>24 [22, 27]   | 19 (14)<br>27 [25, 29.5]   | 39 (40)<br>24 [22, 26]       | 0.018 <sup>‡</sup> |
| <b>PAP, cmH<sub>2</sub>O</b>                                | <i>n (n missing)</i> | 58 (54)<br>25 [20, 30]   | 33 (0)<br>27 [21, 30]      | 76 (3)<br>24 [20, 28.2]      | 0.176 <sup>‡</sup> |
| <b>Tidal volume, ml kg<sup>-1</sup> (PBW)</b>               | <i>n (n missing)</i> | 108 (4)<br>7.2 (2.1)     | 32 (1)<br>7.2 (2.5)        | 76 (3)<br>7.2 (2)            | 0.964 <sup>#</sup> |
| <b>P/F ratio</b>                                            |                      | 17 [13.6, 21.3]          | 15.2 [11.7, 18]            | 17.8 [14.3, 21.4]            | 0.047 <sup>‡</sup> |
| <b>PEEP, cmH<sub>2</sub>O</b>                               | <i>n (n missing)</i> | 111 (1)<br>9.8 (3.6)     | 33 (0)<br>10.2 (3.4)       | 78 (1)<br>9.7 (3.7)          | 0.447 <sup>#</sup> |
| <b>Resp rate, minute<sup>-1</sup></b>                       |                      | 24.3 (5.3)               | 24.8 (5.2)                 | 24.1 (5.3)                   | 0.489 <sup>#</sup> |
| <b>Driving pressure, cmH<sub>2</sub>O</b>                   | <i>n (n missing)</i> | 58 (54)<br>14.7 (7.1)    | 19 (14)<br>15.9 (5.7)      | 39 (40)<br>14.0 (7.6)        | 0.290 <sup>#</sup> |
| <b>Dynamic compliance, ml cmH<sub>2</sub>O<sup>-1</sup></b> | <i>n (n missing)</i> | 58 (54)<br>29.8 [20, 40] | 19 (14)<br>21.3 [17.9, 36] | 39 (40)<br>34.3 [22.7, 41.8] | 0.082 <sup>‡</sup> |
| <b>Murray lung injury score</b>                             | <i>n (n missing)</i> | 100 (12)<br>2.8 [2.3, 3] | 31 (2)<br>2.8 [2.5, 3.3]   | 69 (10)<br>2.8 [2.3, 3]      | 0.491 <sup>‡</sup> |

RVD defined as RV dilatation *and/or* septal flattening

Data are presented as mean (SD), median [IQR] or n (%). Data are complete unless indicated by *n (n missing)*. P-values provided are for comparisons between RVD vs no RVD. # = Student's T-test. † = Fisher's Exact test. ‡ = Wilcoxon Mann-Whitney test. Missing data indicated by *n (n missing)*.

A, NT-proBNP ≥300 ng L<sup>-1</sup>

B, hsTnT ≥15 ng L<sup>-1</sup> or hsTnI ≥34 ng L<sup>-1</sup> for males; ≥16 ng L<sup>-1</sup> for females

RVD = Right Ventricular Dysfunction, RRT = Renal Replacement Therapy, BE = Base Excess, CRP = C-Reactive Protein, PT = Prothrombin Time, APTT = Activated Partial Thromboplastin Time, NT-proBNP = N-terminal pro B-type Natriuretic Peptide, hsTn = High Sensitivity Troponin, HR = Heart Rate, AF = Atrial Fibrillation, BP = Blood Pressure, CVP = Central Venous Pressure, FiO<sub>2</sub> = Fraction of Inspired Oxygen, PAP = Peak Airway Pressure, PBW = Predicted Body Weight, PEEP = Positive End Expiratory Pressure.

**Supplementary Table 6. Logistic regression model predicting 30-day mortality adjusting for remaining variables in table**

|                                                                           | <b>OR (95% CI)</b> | <b>p-value</b> |
|---------------------------------------------------------------------------|--------------------|----------------|
| <b>RV dilatation <i>and/or</i> septal flattening</b>                      | 1.35 (0.54, 3.46), | =0.523         |
| <b>Age, in years (per 5-year increase)</b>                                | 1.52 (1.21, 1.97), | =0.001         |
| <b>Female Gender</b>                                                      | 1.09 (0.44, 2.70), | =0.855         |
| <b>Non-white ethnicity</b>                                                | 0.68 (0.15, 2.90), | =0.610         |
| <b>APACHE II score on admission to ICU (per 5-score increase)</b>         | 1.30 (0.88, 1.98), | =0.191         |
| <b>Time from intubation to date of echo, in days (per 1-day increase)</b> | 1.02 (0.88, 1.17), | =0.826         |

APACHE = Acute Physiology And Chronic Health Evaluation
